# Supplementary material
Source: Elsevier journal article supplement (https://www.sciencedirect.com/science/article/pii/S0034709420304311)
Supplement: mmc1 [file S0034709420304311:mmc1.doc]

**Material Suplementar**

**Figura S2** A, Correlação entre os escores Z compostos no 7DPO e duração da anestesia. B, Correlação entre os escores Z compostos no 7DPO e duração do Trendelenburg.


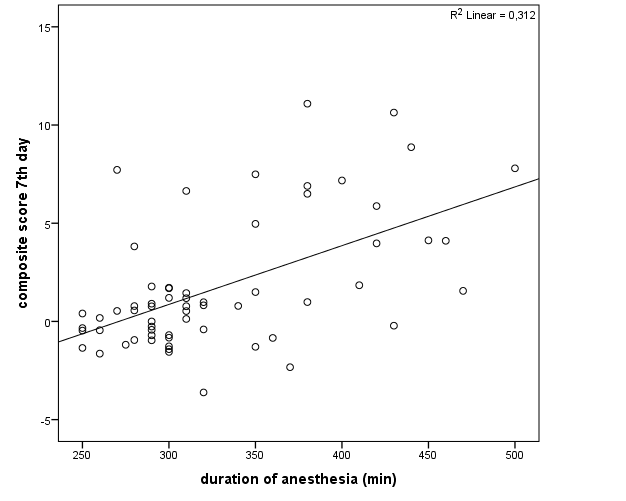


[REPLACE]

**Composite score 7th day = 7DPO – Escores Compostos**

**Duration of anesthesia (min) = Tempo de Trendelenburg (min)**

**Figura S3** A, Curvas ROC da S100B para os pacientes com DCPO no 7DPO. B, Curvas ROC da S100B para os pacientes com DCPO no 3MPO.


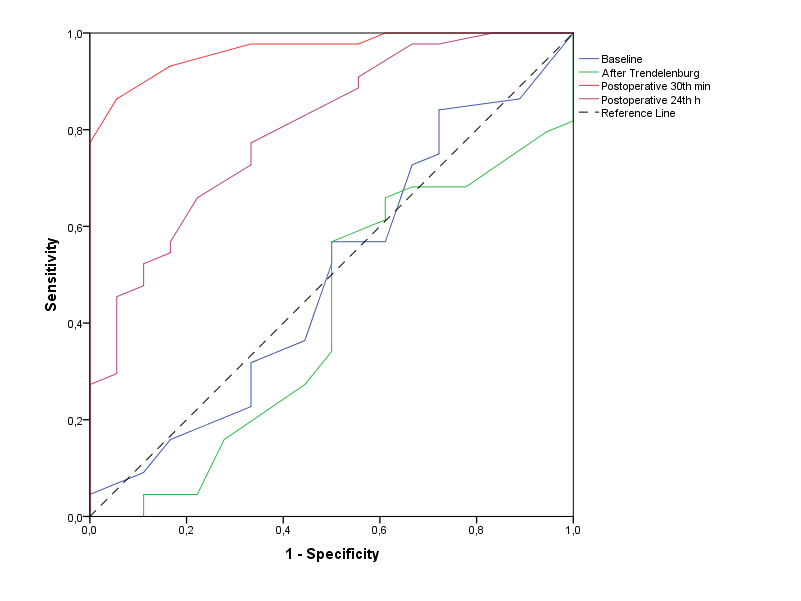


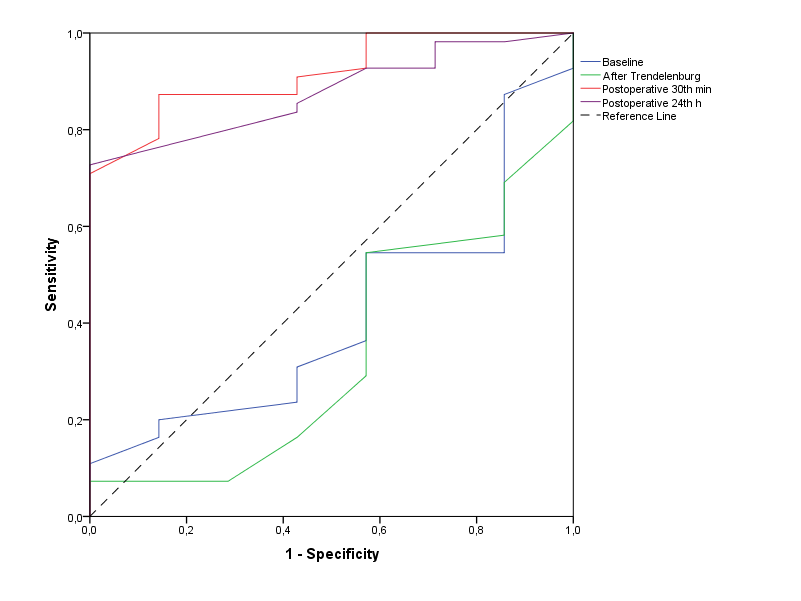


[REPLACE]

**Baseline = Linha de Base**

**After Trendelenburg = Após Trendelenburg**

**Postoperative 30th min = 30 minutos pós-peratórios**

**Postoperative 24th h = 24 horas pós-operatórias**

**Reference line = Linha de referência**

**Sensitivity = Sensibilidade**

**1-Specificity = 1-Especificidade**
